# Supplementary material
Source: Research Square preprint supplement (doi:10.21203/rs.3.rs-9406416/v1)
Supplement: Supplementary file 1 [file 27e9d3017e44cbbd28bd0d5d.docx]

# **Supplementary Martials**


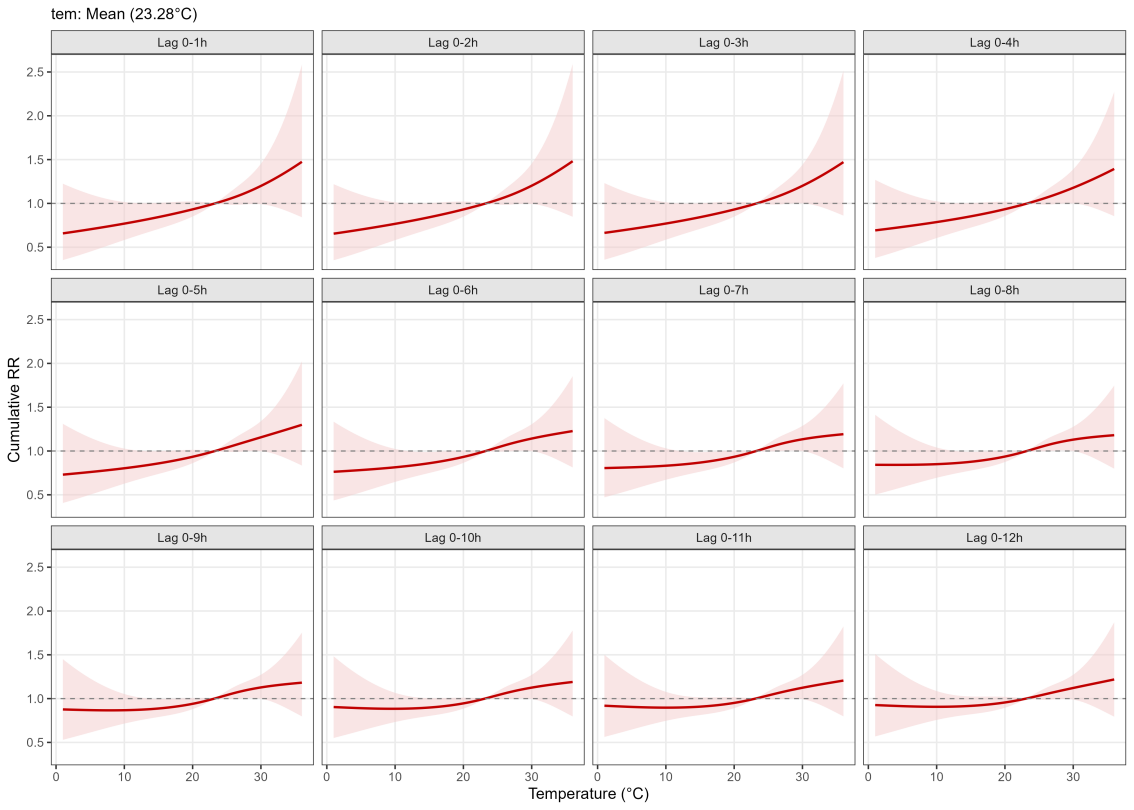


**Fig. S1** Cumulative exposure-response relationship between temperature and electric bicycle accident risk: Sensitivity analysis based on the baseline model with 3 degrees of freedom for temperature.


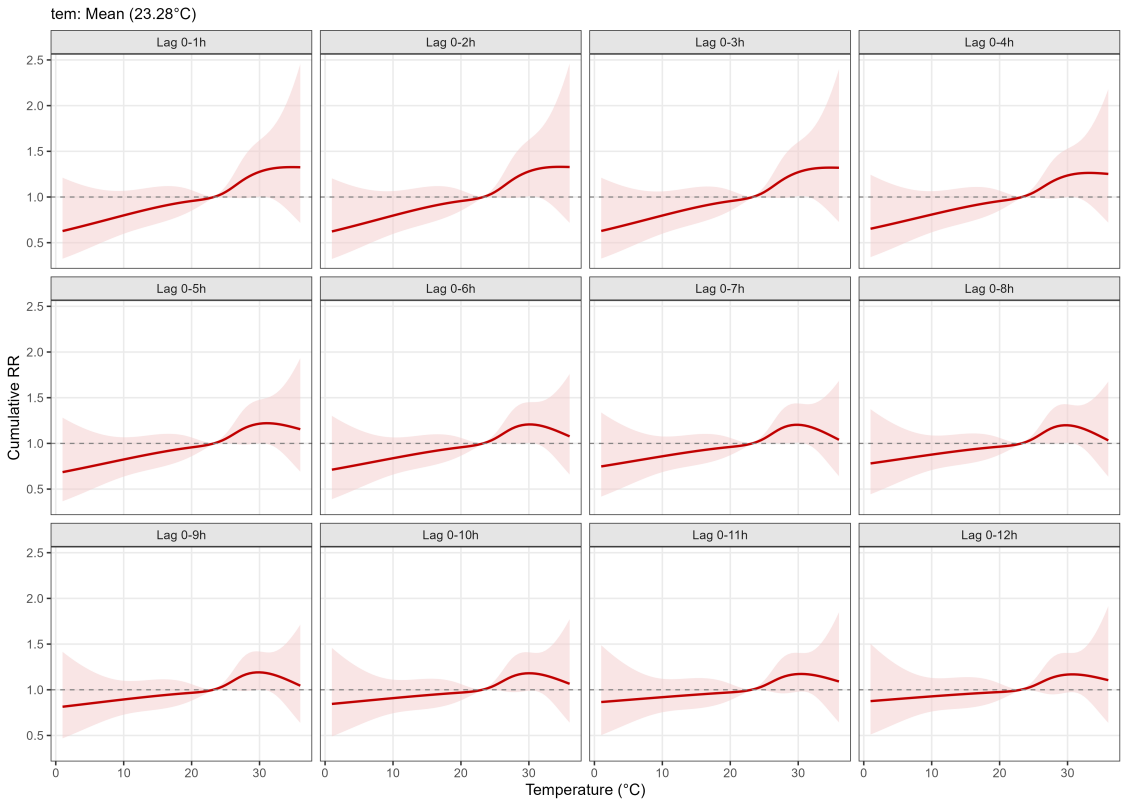


**Fig. S2** Association between temperature and electric bicycle accident risk: Sensitivity analysis varying the degrees of freedom for temperature natural cubic spline to 4.


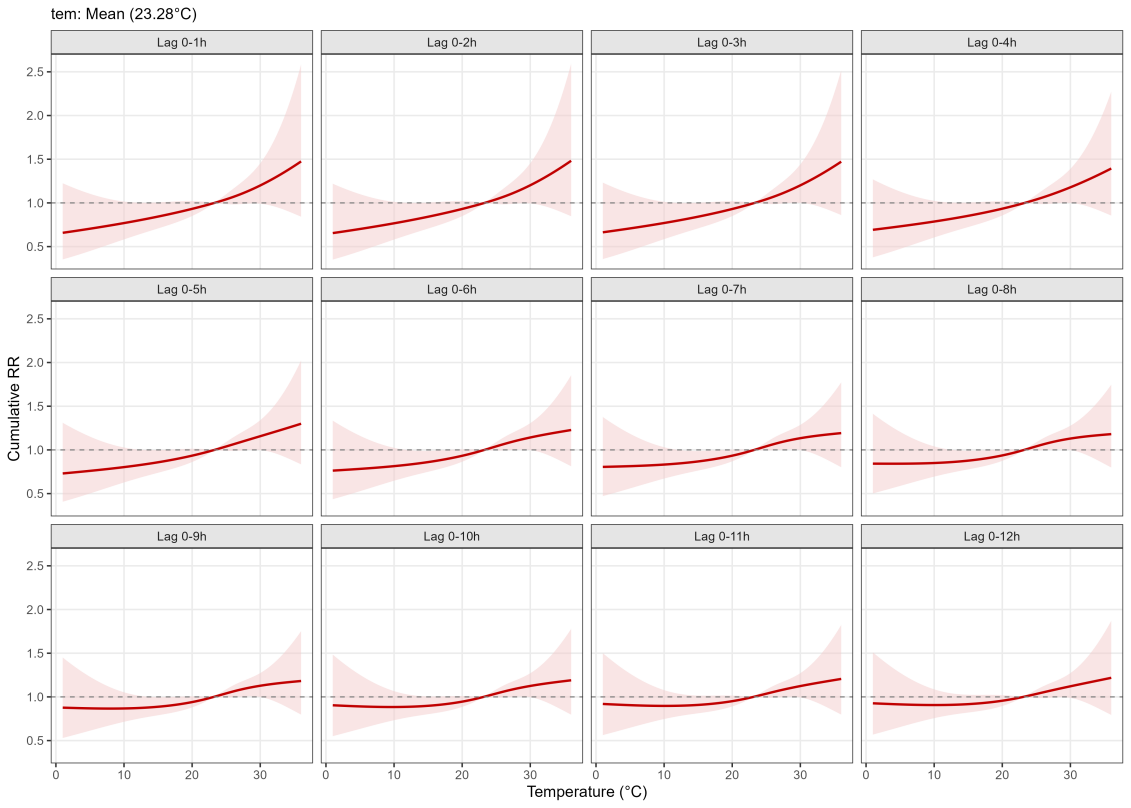


**Fig. S3** Temperature effects under adjusted air quality control: Sensitivity analysis with 3 degrees of freedom for PM2.5.


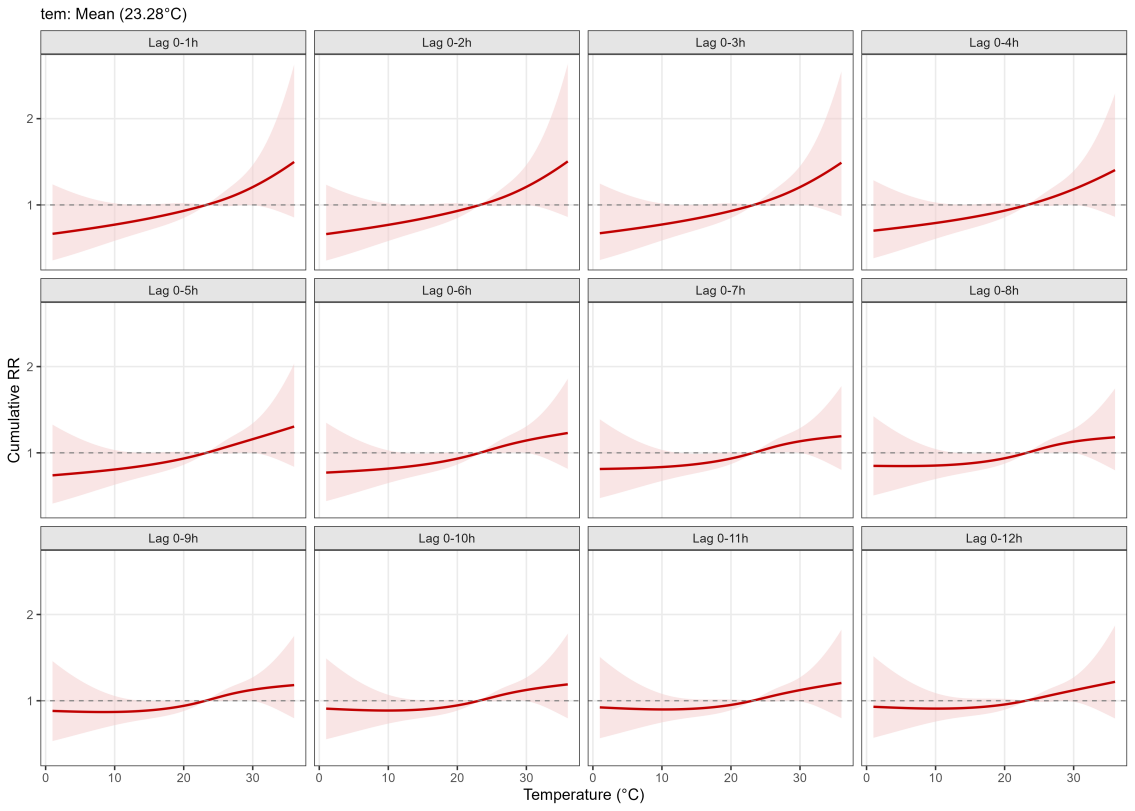


**Fig. S4** Temperature effects under adjusted air quality control: Sensitivity analysis with 4 degrees of freedom for PM2.5.


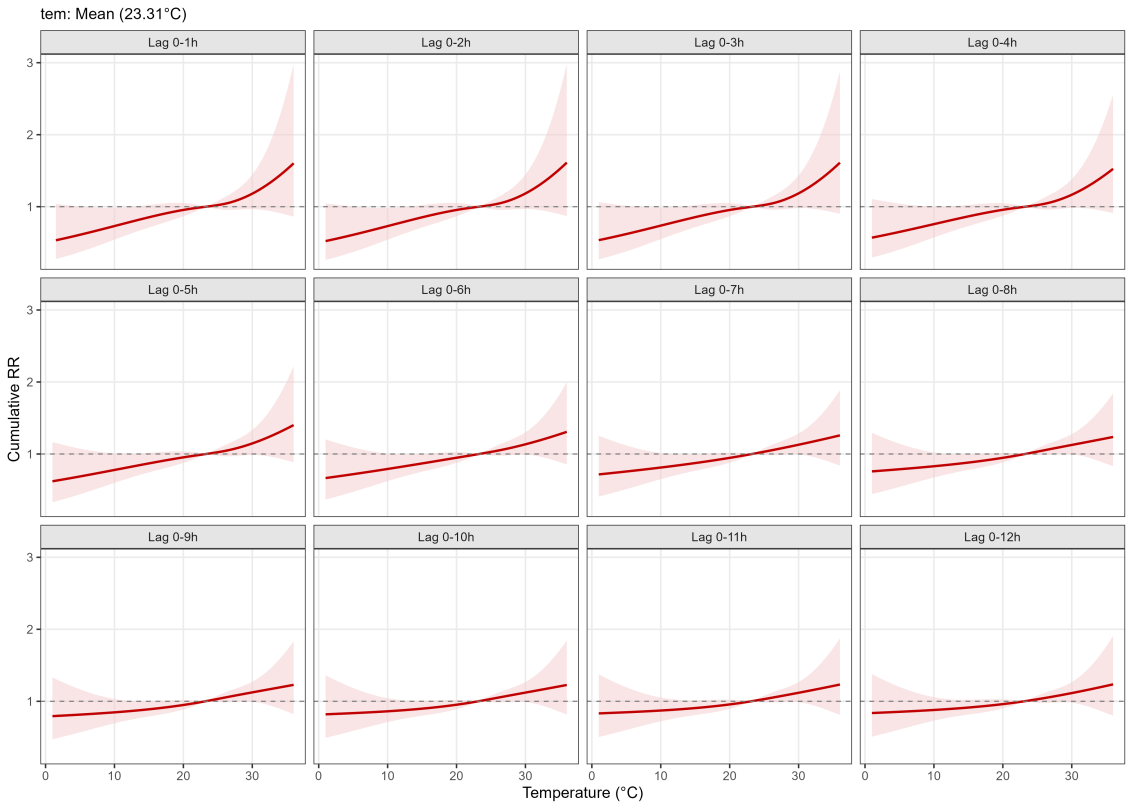


**Fig. S5** Exposure-response relationship excluding extreme temperatures: Sensitivity analysis based on data truncated at the 1st and 99th percentiles of temperature.
